# Supplementary material for: Piperlongumine inhibits lung tumor growth via inhibition of nuclear factor kappa B signaling pathway
Source: PubMed Central journal article supplement (PMC4873819; doi:10.1038/srep26357), 2016-05-20

# Supplementary Materials

Piperlongumine inhibits lung tumor growth via inhibition of nuclear factor kappa B signaling pathway

Jie Zheng<sup>1</sup>, Dong Ju Son<sup>1</sup>, Sun Mi Gu<sup>1</sup>, Ju Rang Woo<sup>2</sup>,  
Young Wan Ham<sup>3</sup>, Hee Pom Lee<sup>1</sup>, Wun Jae Kim<sup>4</sup>, Jae  
Kyung Jung<sup>1</sup>, Jin Tae Hong<sup>1\*</sup>

**Supplementary Figure 1A: List of PL analogues.** (1) 3-phenyl-1-(piperidin-1-yl)prop-2-en-1-one. (2) 3-(3,4-methylenedioxyphenyl)-1-(piperidin-1-yl)prop-2-en-1-one. (3) 3-(3,4,5-trimethoxyphenyl)-1-(piperidin-1-yl)prop-2-en-1-one. (4) 3-phenyl-1-(4-methylpiperidin-1-yl)prop-2-en-1-one. (5) 3-(3,4-methylenedioxyphenyl)-1-(4-methylpiperidin-1-yl)prop-2-en-1-one. (6) 3-(3,4,5-trimethoxyphenyl)-1-(4-methylpiperidin-1-yl)prop-2-en-1-one. (7) 3-phenyl-1-(3-methylpiperidin-1-yl)prop-2-en-1-one. (8) 3-(3,4-methylenedioxyphenyl)-1-(3-methylpiperidin-1-yl)prop-2-en-1-one. (9) 3-(3,4,5-trimethoxyphenyl)-1-(3-methylpiperidin-1-yl)prop-2-en-1-one. (10) 3-phenyl-1-(2-methylpiperidin-1-yl)prop-2-en-1-one. (11) 3-(3,4-methylenedioxyphenyl)-1-(2-methylpiperidin-1-yl)prop-2-en-1-one. (12) 3-(3,4,5-trimethoxyphenyl)-1-(2-methylpiperidin-1-yl)prop-2-en-1-one. (13) 3-phenyl-1-(2,6-dimethylpiperidin-1-yl)prop-2-en-1-one. (14) 3-(3,4-methylenedioxyphenyl)-1-(2,6-dimethylpiperidin-1-yl)prop-2-en-1-one. (15) 3-(3,4,5-trimethoxyphenyl)-1-(2,6-dimethylpiperidin-1-yl)prop-2-en-1-one. (16) 3-phenyl-1-(2-piperidon-1-yl)prop-2-en-1-one. (17) 3-(3,4-methylenedioxyphenyl)-1-(2-piperidon-1-yl)prop-2-en-1-one. (18) 3-(3,4,5-trimethoxyphenyl)-1-(2-piperidon-1-yl)prop-2-en-1-one. (19) 3-phenyl-1-(piperazin-1-yl)prop-2-en-1-one. (20) 3-(3,4-methylenedioxyphenyl)-1-(piperazin-1-yl)prop-2-en-1-one.

**Supplementary Figure 1B: List of PL analogues.** (21) 3-(3,4,5-trimethoxyphenyl)-1-(piperazin-1-yl)prop-2-en-1-one (22) 3-phenyl-1-(4-methylpiperazin-1-yl)prop-2-en-1-one (23) 3-(3,4-methylenedioxyphenyl)-1-(4-methylpiperazin-1-yl)prop-2-en-1-one (24) 3-(3,4,5-trimethoxyphenyl)-1-(4-methylpiperazin-1-yl)prop-2-en-1-one (25) 3-phenyl-1-(2,6-dimethylpiperazin-1-yl)prop-2-en-1-one (26) 3-(3,4-methylenedioxyphenyl)-1-(2,6-dimethylpiperazin-1-yl)prop-2-en-1-one (27) 3-(3,4,5-trimethoxyphenyl)-1-(2,6-dimethylpiperazin-1-yl)prop-2-en-1-one (28) 3-phenyl-1-(morpholin-4-yl)prop-2-en-1-one (29) 3-(3,4-methylenedioxyphenyl)-1-(morpholin-4-yl)prop-2-en-1-one (30) 3-(3,4,5-trimethoxyphenyl)-1-(morpholin-4-yl)prop-2-en-1-one (31) 3-phenyl-1-(thiomorpholin-4-yl)prop-2-en-1-one (32) 3-(3,4-methylenedioxyphenyl)-1-(thiomorpholin-4-yl)prop-2-en-1-one (33) 3-(3,4,5-trimethoxyphenyl)-1-(thiomorpholin-4-yl)prop-2-en-1-one (34) 3-phenyl-1-(3-methylpiperazin-1-yl)prop-2-en-1-one (35) 3-(3,4-methylenedioxyphenyl)-1-(3-methylpiperazin-1-yl)prop-2-en-1-one (36) 3-(3,4,5-trimethoxyphenyl)-1-(3-methylpiperazin-1-yl)prop-2-en-1-one

**Supplementary Figure 2: Effect of PL analogues on the growth of A549 NSCLC cells and on NF- $\kappa$ B luciferase activities.** (A) A549 Cells were plated in 96-well and treated with 36 PL analogues and PL for 24 h, cell viability was determined by MTT assay. Data was expressed as the mean  $\pm$  S.D. of three experiments. (B) A549 cells were transfected with p-NF- $\kappa$ B-Luc plasmid (5x NF- $\kappa$ B), and the treated with PL (10  $\mu$ M) for 24 h. Luciferase activity was then determined as described in the materials and methods.

**Supplementary Figure 3: Effect of Fas siRNA or DR4 siRNA on the expression of each DR.** Expression of DR was determined by Western blotting with antibodies against Fas, DR4 and  $\beta$ -actin (internal control). For the cropped images, samples were run in the same gels under same experimental conditions and processed in parallel. Each band is representative for three experiments.

# Supplementary Figure 1A

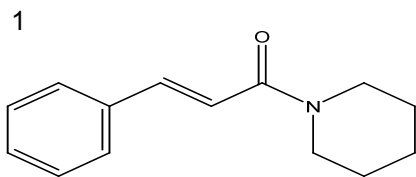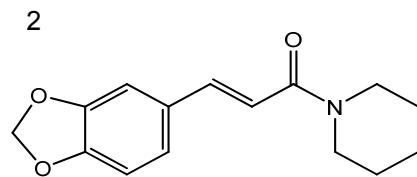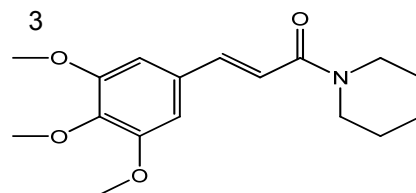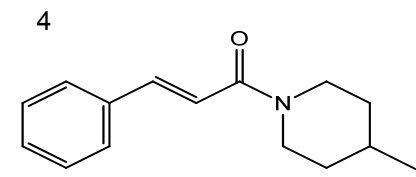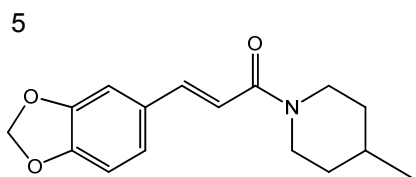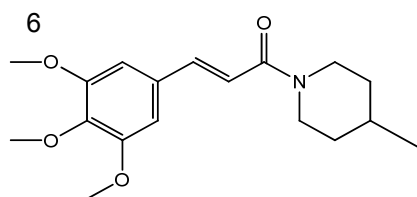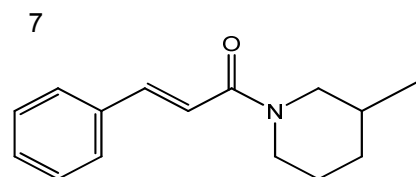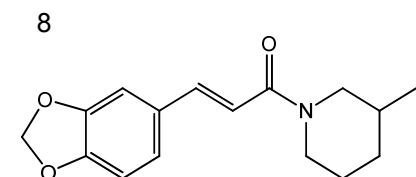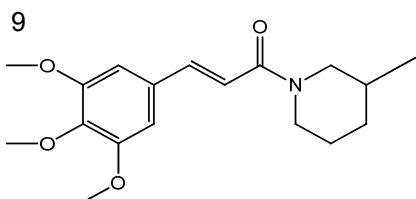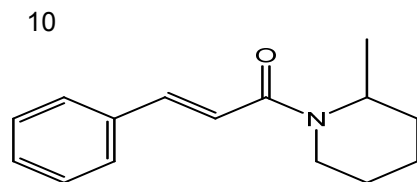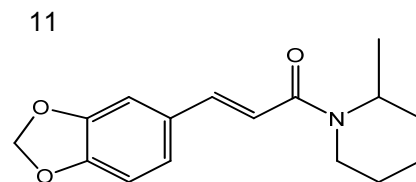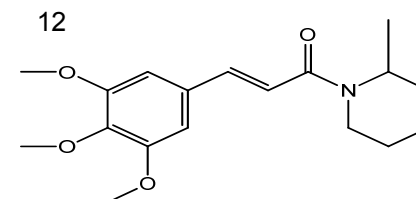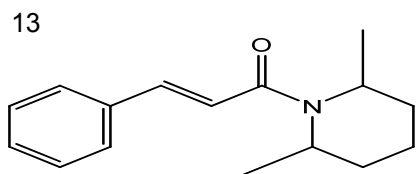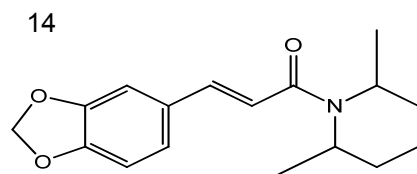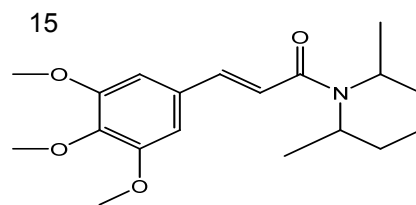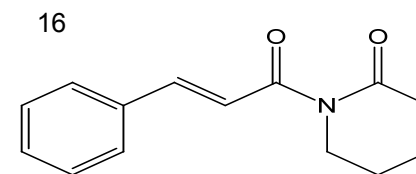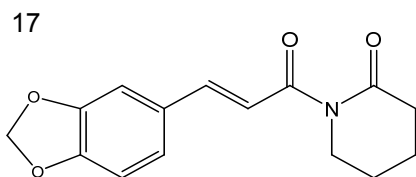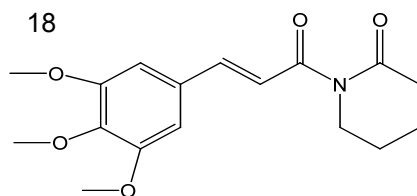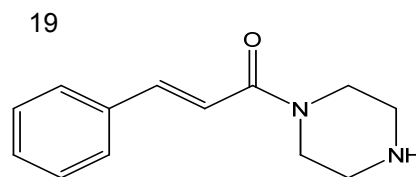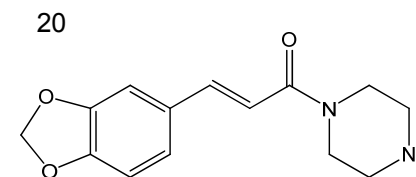

# Supplementary Figure 1B

21

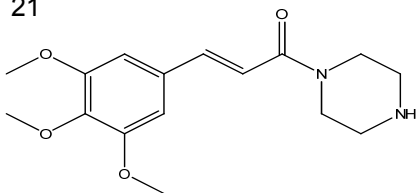

22

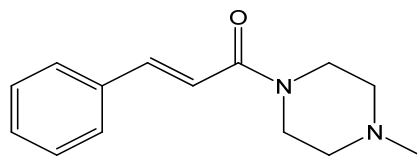

23

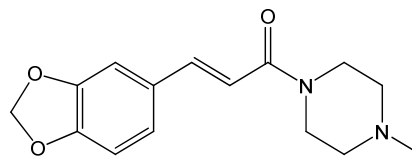

24

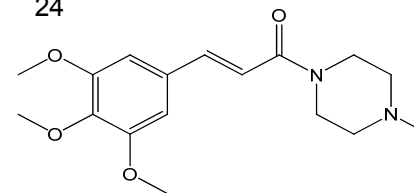

25

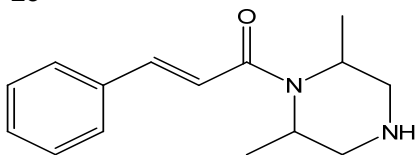

26

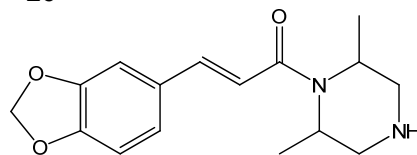

27

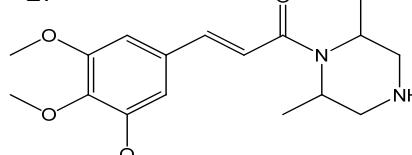

28

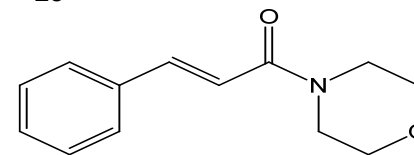

29

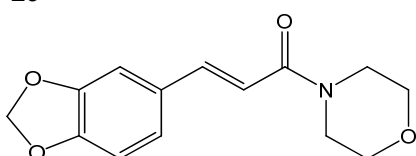

30

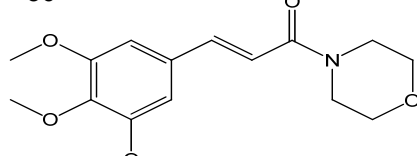

31

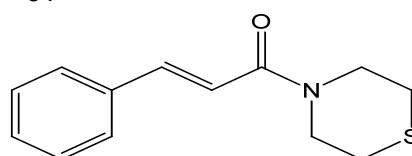

32

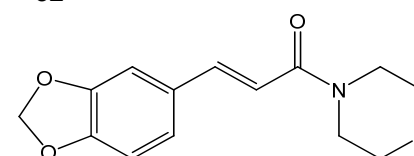

33

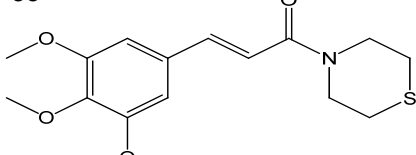

34

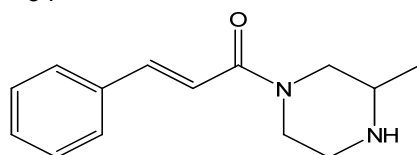

35

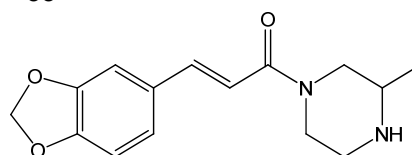

36

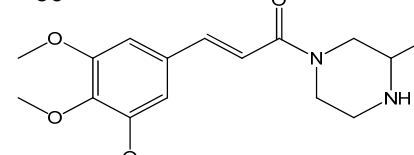

# Supplementary Figure 2

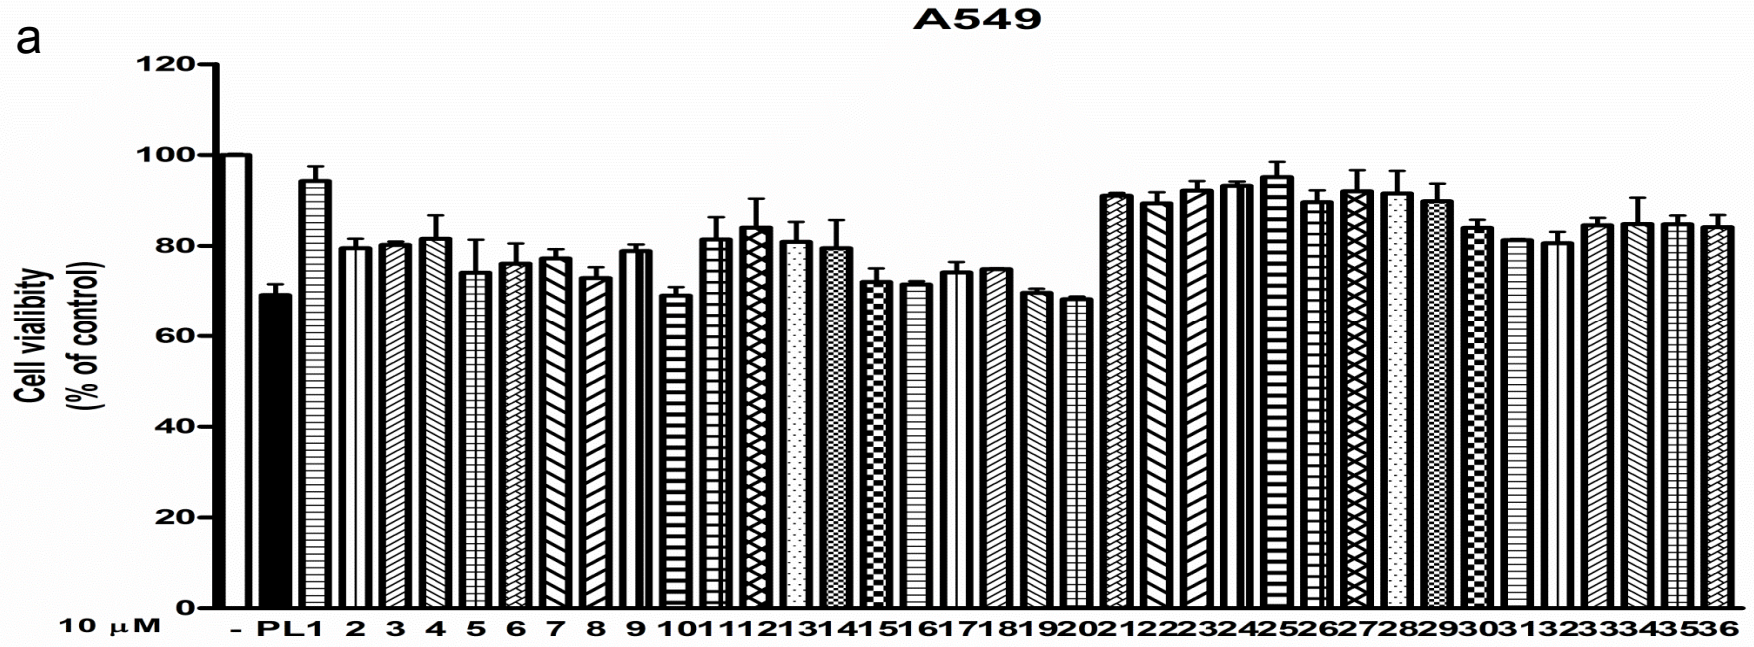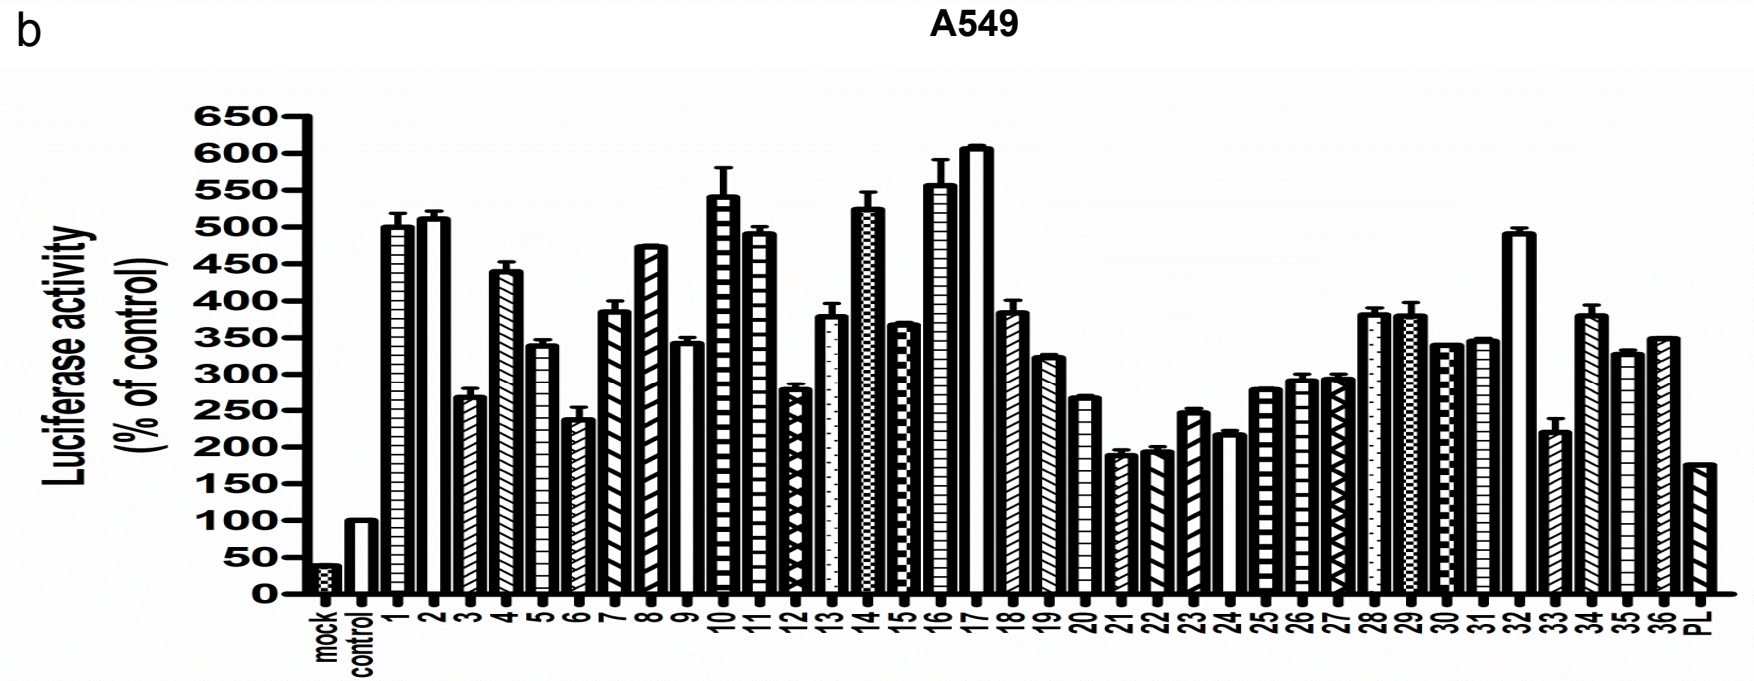

### Supplementary Figure 3

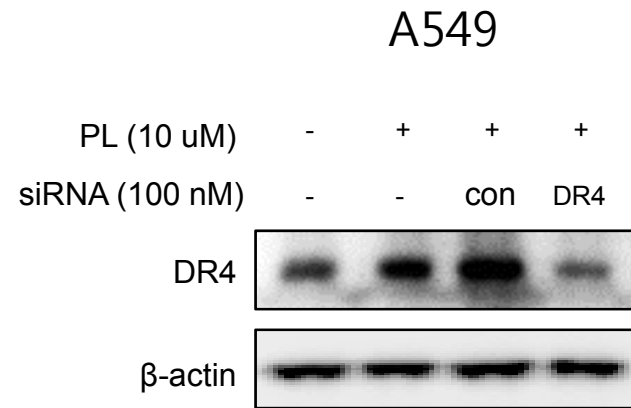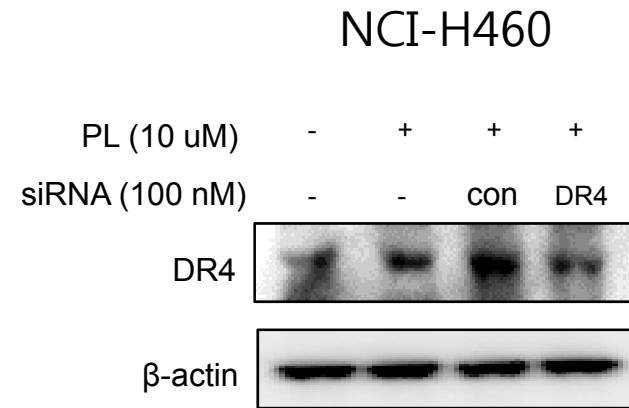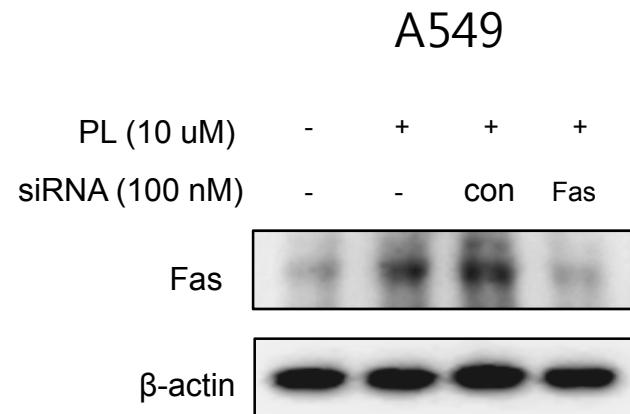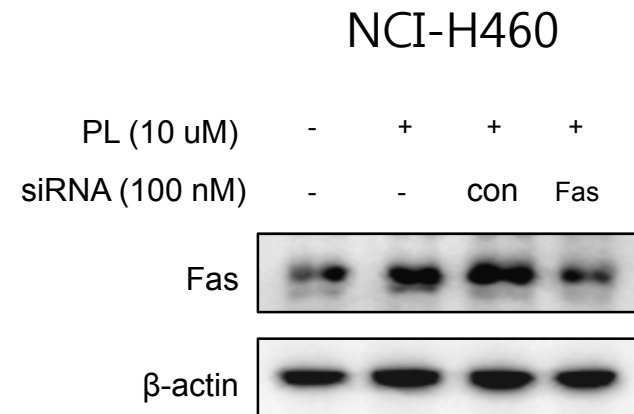

# Supplementary Figure 4

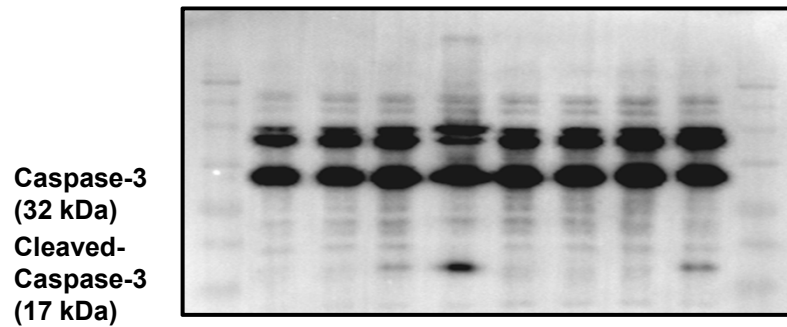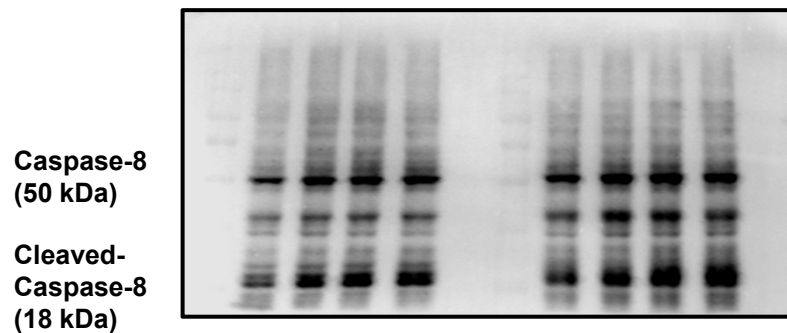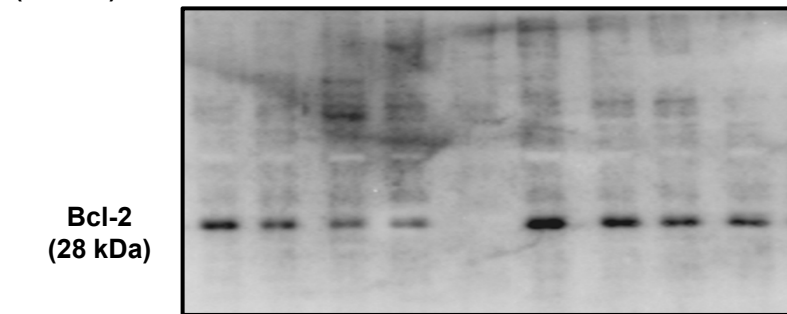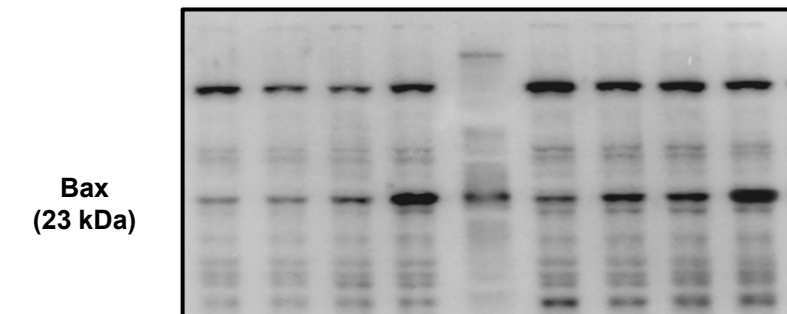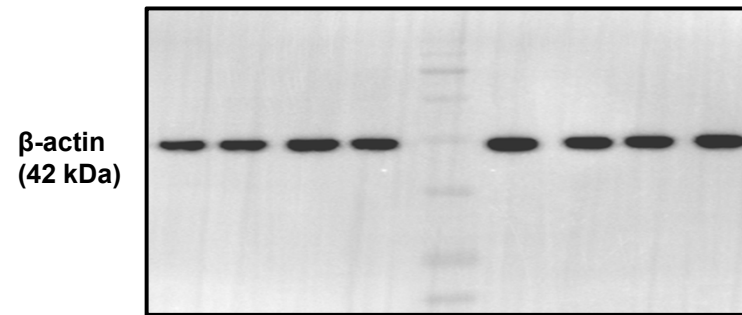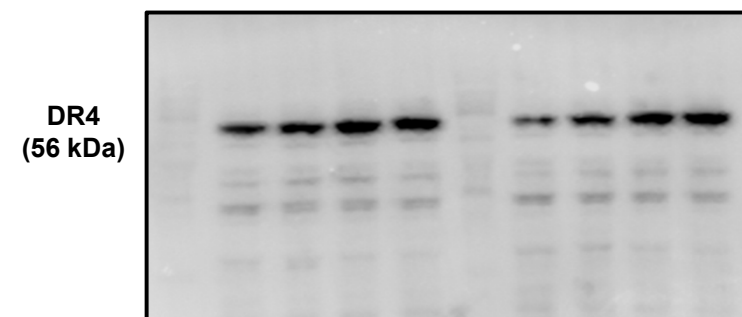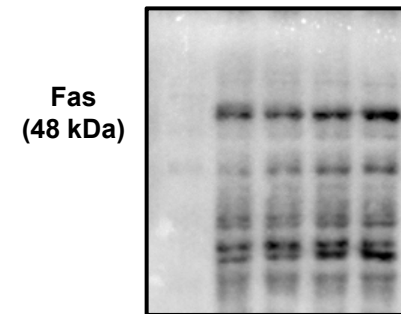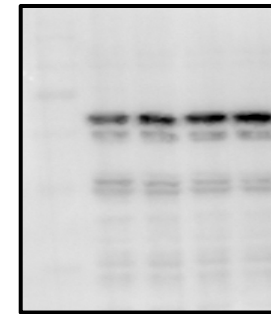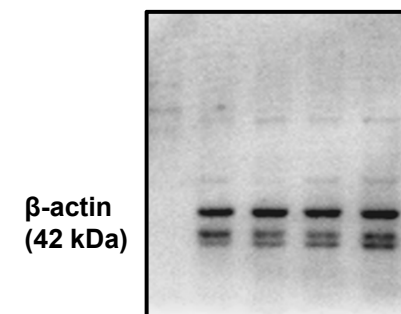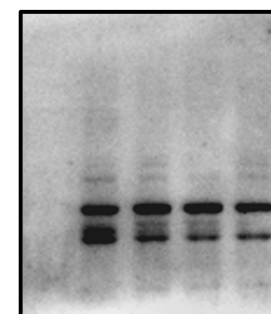

# Supplementary Figure 5

I $\kappa$ B $\alpha$   
(31-41  
kDa)

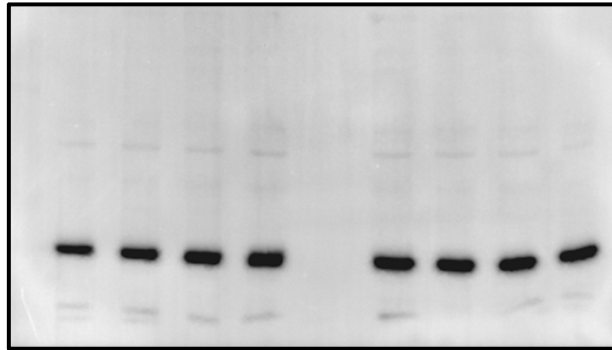

p50  
(50 kDa)

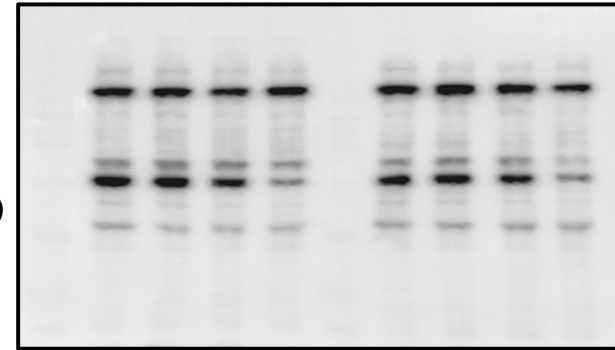

p-I $\kappa$ B $\alpha$   
(41 kDa)

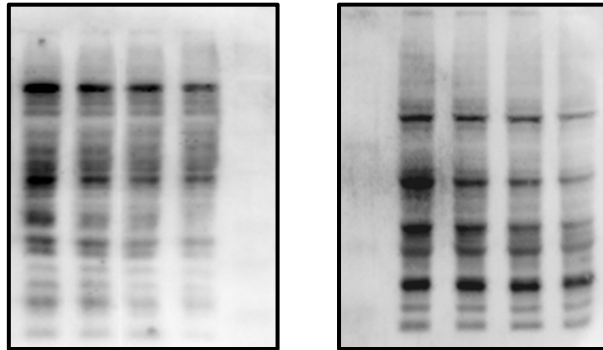

p65  
(65 kDa)

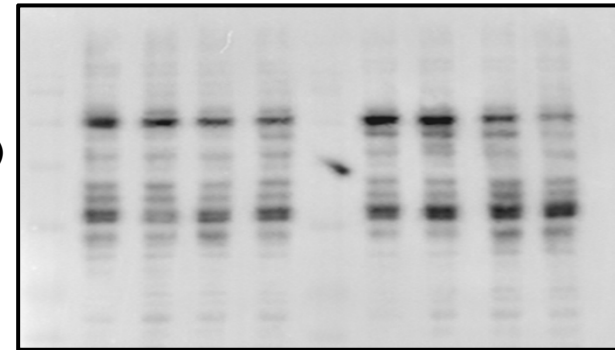

$\beta$ -actin  
(42 kDa)

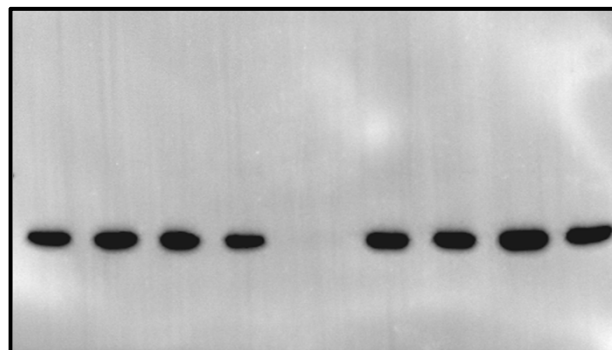

Histone-H1  
(32 kDa)

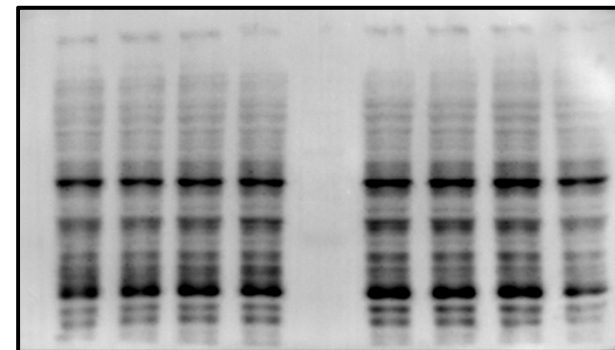



# Supplementary Figure 6

Fas  
(48 kDa)

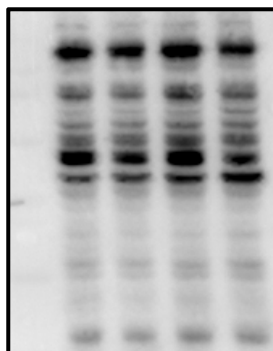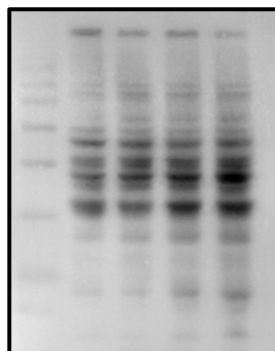

Fas  
(48 kDa)

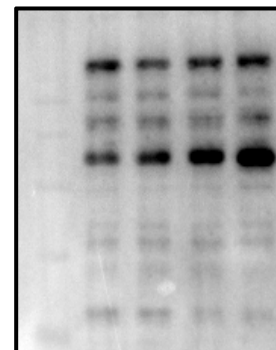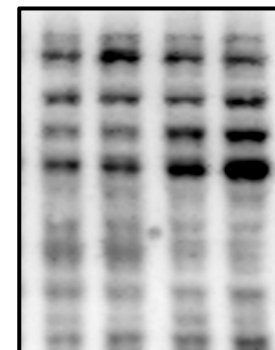

DR4  
(56 kDa)

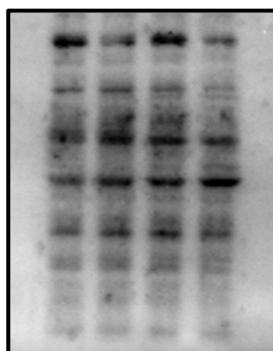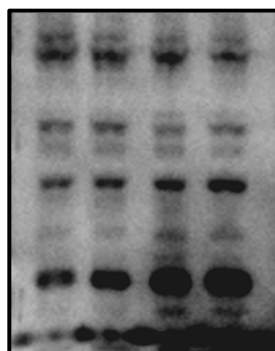

DR4  
(56 kDa)

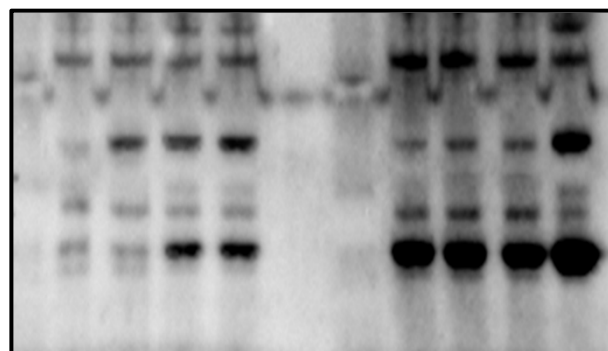

$\beta$ -actin  
(42 kDa)

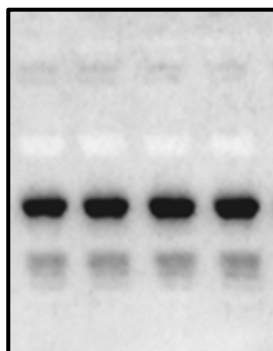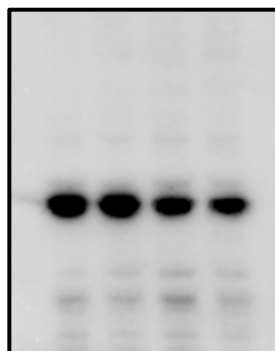

$\beta$ -actin  
(42 kDa)

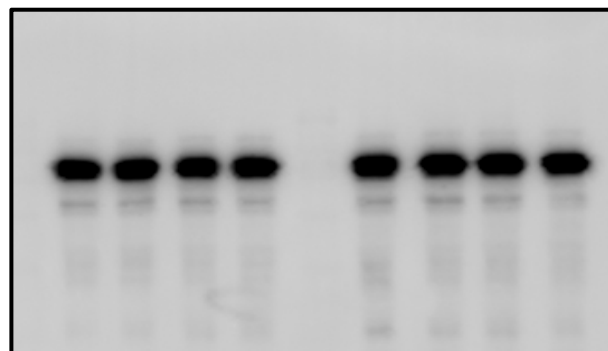

# Supplementary Figure 7

Fas  
(48 kDa)

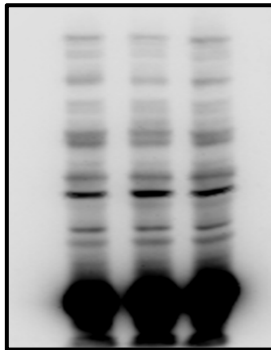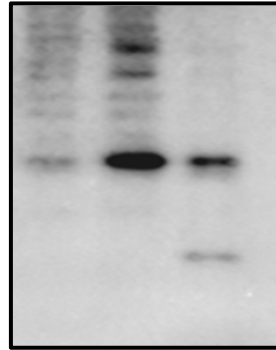

$\beta$ -actin  
(42 kDa)

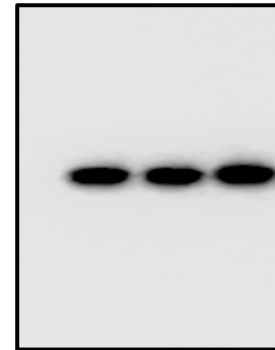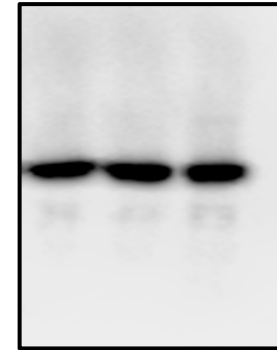

DR4  
(56 kDa)

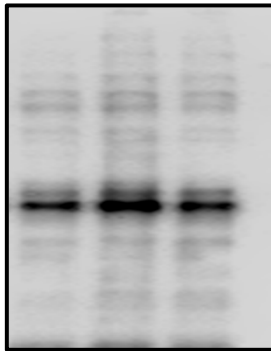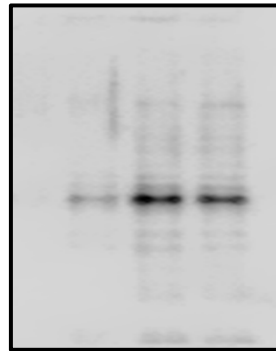

p50  
(50 kDa)

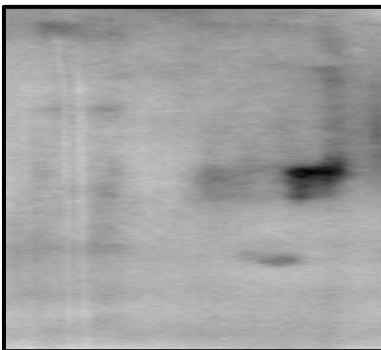

p50  
(50 kDa)

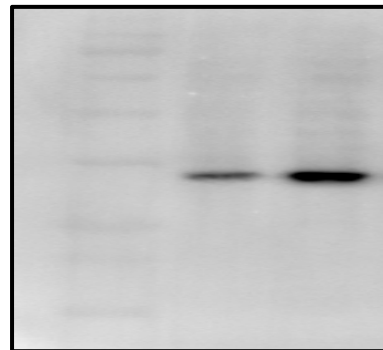

p50  
(50 kDa)

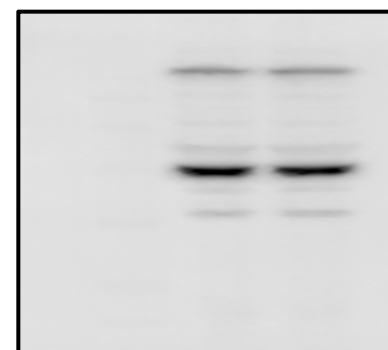

# Supplementary Figure 8

Fas  
(48 kDa)

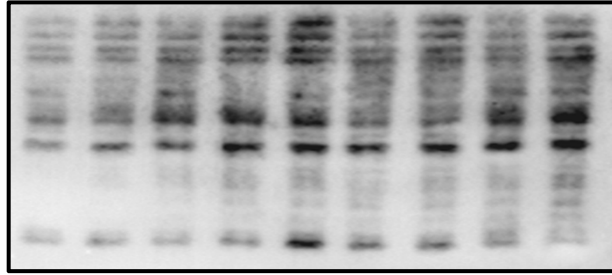

Cleaved-  
Caspase-3  
(11,17,20  
kDa)

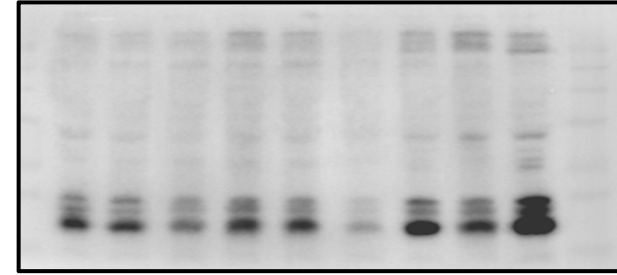

DR4  
(56 kDa)

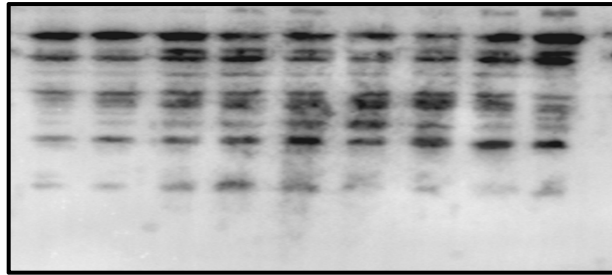

Caspase-8  
(57 kDa)

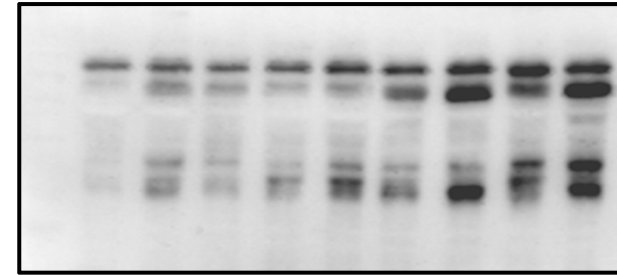

Cleaved-  
Caspase-8  
(18 kDa)

$\beta$ -actin  
(42 kDa)

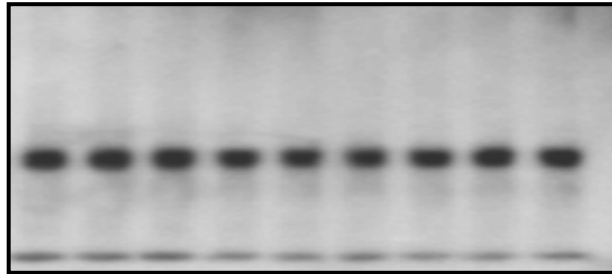

Bax  
(23 kDa)

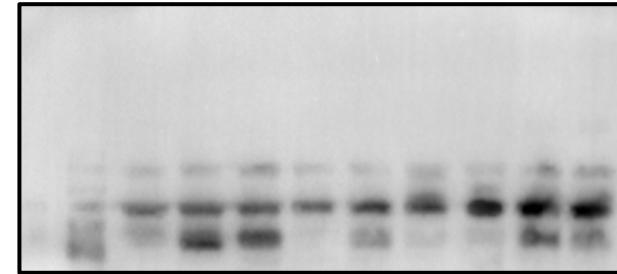

48 kDa

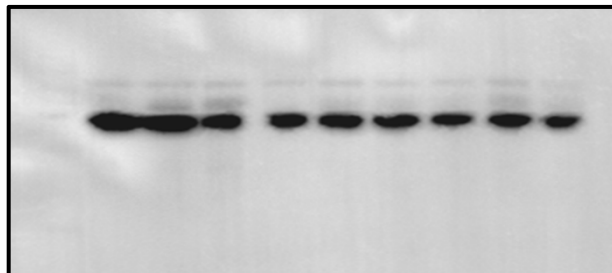

$\beta$ -actin  
(42 kDa)

Bcl-2  
(28 kDa)

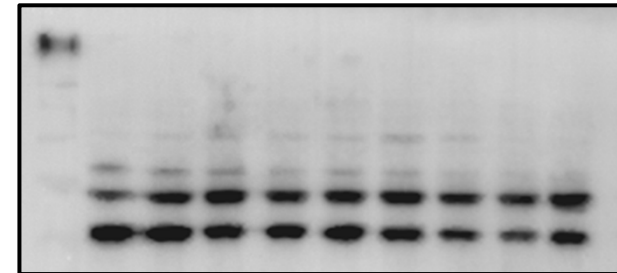

## Supplementary Figure 9

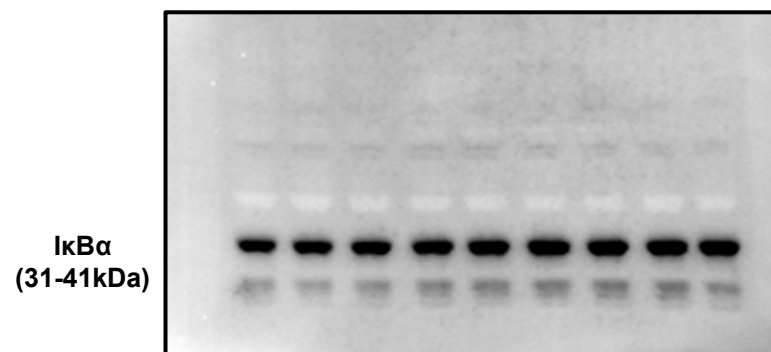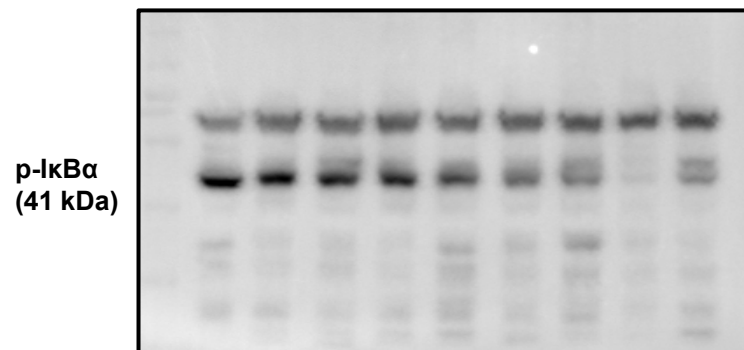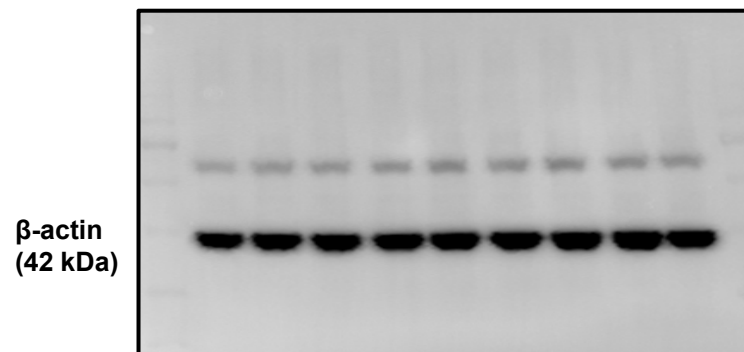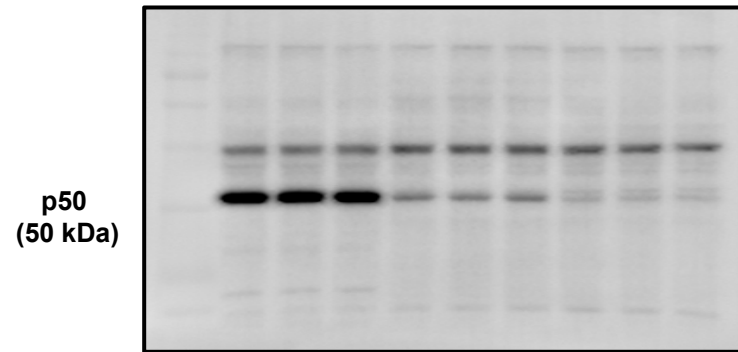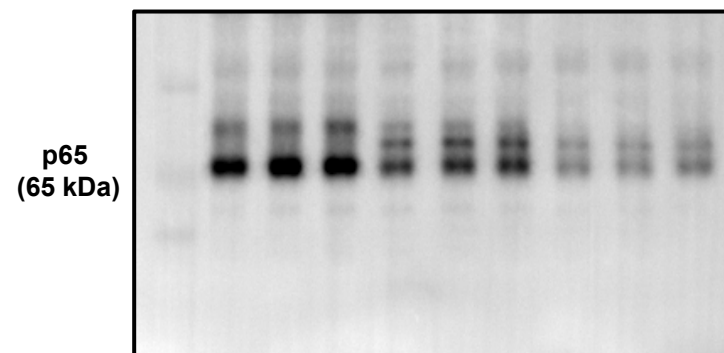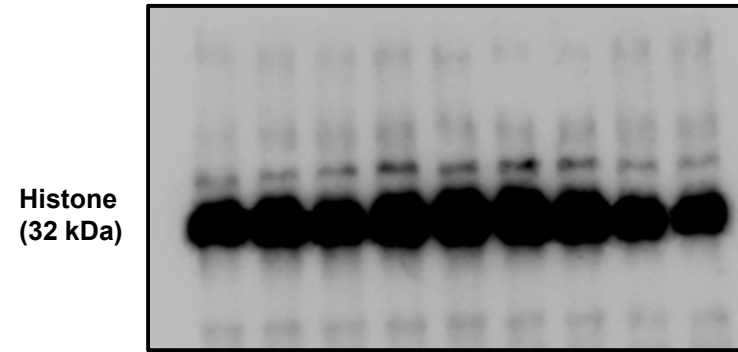

Supplement: srep26357-s1.pdf [file srep26357-s1.pdf]
